# Supplementary material for: The margin of stability is affected differently when walking under quasi-random treadmill perturbations with or without full visual support
Source: PeerJ. 2024 Feb 19;12:e16919. doi: 10.7717/peerj.16919 (PMC10883149; doi:10.7717/peerj.16919)
Supplement: Supplemental Information 1 — All parameters from all recruited participants. [file peerj-12-16919-s001.xlsx]

## Sheet: PWS
Preferred Walking Speed (PWS)	m/s
Sub01	1.5
Sub02	1.4
Sub03	1.4
Sub04	1.4
Sub05	1.5
Sub06	1.4
Sub07	1.2
Sub08	1.4
Sub09	1.3
Sub10	1.6
Sub11	1.6
Sub12	1.6
Sub13	1.3
Sub14	1.6
Sub15	1.4
Sub16	1.5
Sub17	1.6
Sub18	1.3
Sub19	1.4
Sub20	1.4
avg	1.44
std	0.118766

## Sheet: StepLength
Step Length (mm)	Norm	Slip	Slip_VisionBlocked
Sub01	567.988	573.892	620.512		Tests of Normality
Sub02	530.32	497.264	590.742		Shapiro-Wilk
Sub03	557.066	576.368	555.478			Statistic	df	Sig.
Sub04	619.358	566.836	610.018		Norm	0.947	20	0.319
Sub05	585.21	572.443	628.511		Slip	0.937	20	0.208
Sub06	620.236	590.044	594.435		Slip_VisionBlocked	0.941	20	0.253
Sub07	695.527	694.221	628.6		*. This is a lower bound of the true significance.
Sub08	679.404	703.197	675.929		a. Lilliefors Significance Correction
Sub09	596.876	614.215	646.547
Sub10	536.474	518.255	559.589
Sub11	628.55	615.833	551.981		Descriptive Statistics
Sub12	657.819	675.99	663.48			Mean	Std. Deviation	N
Sub13	513.542	515.737	444.019		Norm	578.736	68.2784	20
Sub14	476.687	496.034	412.031		Slip	572.708	69.6213	20
Sub15	507.833	517.468	534.299		Slip_VisionBlocked	574.925	75.2457	20
Sub16	628.067	608.432	627.41
Sub17	665.534	636.365	659.565
Sub18	518.412	508.249	512.234		Tests of Within-Subjects Effects
Sub19	483.593	469.641	475.746		Measure: MEASURE_1
Sub20	506.224	503.688	507.373		Source		Type III Sum of Squares	df	Mean Square	F	Sig.	Partial Eta Squared	Noncent. Parameter	Observed Powera
avg	578.736	572.708	574.925		conds	Sphericity Assumed	371.767	2	185.884	0.258	0.774	0.013	0.516	0.088
std	68.2784	69.6213	75.2457			Greenhouse-Geisser	371.767	1.31	283.879	0.258	0.679	0.013	0.338	0.081
						Huynh-Feldt	371.767	1.368	271.855	0.258	0.689	0.013	0.353	0.081
						Lower-bound	371.767	1	371.767	0.258	0.617	0.013	0.258	0.077
					Error(conds)	Sphericity Assumed	27354.2	38	719.848
						Greenhouse-Geisser	27354.2	24.882	1099.34
						Huynh-Feldt	27354.2	25.983	1052.78
						Lower-bound	27354.2	19	1439.7
					a. Computed using alpha = .05

## Sheet: StepLengthV
Step Length Variability (%)	Norm	Slip	Slip_VisionBlocked
Sub01	4.30119	6.80932	8.35362		Tests of Normality
Sub02	2.39036	6.93352	8.2271			Shapiro-Wilk
Sub03	3.90828	7.93622	5.98615			Statistic	df	Sig.
Sub04	2.75099	5.83919	6.89912		Norm	0.968	20	0.719
Sub05	4.21599	8.78091	8.78624		Slip	0.962	20	0.586
Sub06	5.07883	9.02416	6.64546		Slip_VisionBlocked	0.965	20	0.657
Sub07	2.86815	7.19554	5.31379		*. This is a lower bound of the true significance.
Sub08	4.5939	7.05826	6.56942		a. Lilliefors Significance Correction
Sub09	2.40412	7.06914	7.89245
Sub10	4.20239	12.525	9.00034
Sub11	3.7802	8.0282	7.2181		Descriptive Statistics
Sub12	3.39498	7.57794	8.68392			Mean	Std. Deviation	N
Sub13	3.94416	9.385	6.88062		Norm	3.75923	0.875448	20
Sub14	4.49965	9.85318	8.5629		Slip	7.32835	2.21346	20
Sub15	3.86743	8.17632	8.03561		Slip_VisionBlocked	7.65379	1.35903	20
Sub16	3.49772	6.17424	8.08913
Sub17	5.59466	7.57941	10.0055
Sub18	4.09566	4.38447	10.0294		Tests of Within-Subjects Effects
Sub19	2.65215	2.59648	6.17495		Measure: MEASURE_1
Sub20	3.14373	3.64056	5.72209			Source	Type III Sum of Squares	df	Mean Square	F	Sig.	Partial Eta Squared	Noncent. Parameter	Observed Powera
avg	3.75923	7.32835	7.65379		conds	Sphericity Assumed	186.748	2	93.374	52.208	0	0.733	104.417	1
std	0.875448	2.21346	1.35903			Greenhouse-Geisser	186.748	1.516	123.158	52.208	0	0.733	79.165	1
						Huynh-Feldt	186.748	1.62	115.265	52.208	0	0.733	84.586	1
						Lower-bound	186.748	1	186.748	52.208	0	0.733	52.208	1
					Error(conds)	Sphericity Assumed	67.962	38	1.788
						Greenhouse-Geisser	67.962	28.81	2.359
						Huynh-Feldt	67.962	30.783	2.208
						Lower-bound	67.962	19	3.577
					a. Computed using alpha = .05
					Pairwise Comparisons
					Measure: MEASURE_1
					(I) conds	(J) conds	Mean Difference (I-J)	Std. Error	Sig.b	95% Confidence Interval for Differenceb
					Lower Bound	Upper Bound
					1	2	-3.569*	0.441	0	-4.727	-2.411
						3	-3.895*	0.291	0	-4.658	-3.131
					2	1	3.569*	0.441	0	2.411	4.727
						3	-0.325	0.507	1	-1.657	1.006
					3	1	3.895*	0.291	0	3.131	4.658
						2	0.325	0.507	1	-1.006	1.657
					Based on estimated marginal means
					*. The mean difference is significant at the .05 level.
					b. Adjustment for multiple comparisons: Bonferroni.

## Sheet: StepWidth
Step Width (mm)	Norm	Slip	Slip_VisionBlocked
Sub01	165.718	148.784	168.856
Sub02	122.582	126.91	133.081		Tests of Normality
Sub03	109.828	119.72	124.378			Shapiro-Wilk
Sub04	113.364	117.008	125.184			Statistic	df	Sig.
Sub05	165.612	166.016	170.17		Norm	0.964	20	0.635
Sub06	129.019	126.92	138.63		Slip	0.979	20	0.925
Sub07	98.9798	97.9304	99.1804		Slip_VisionBlocked	0.961	20	0.555
Sub08	127.017	126.394	136.828		*. This is a lower bound of the true significance.
Sub09	70.4697	70.8675	82.0039		a. Lilliefors Significance Correction
Sub10	109.046	107.294	125.091
Sub11	69.5809	79.9229	95.3764
Sub12	150.227	140.437	156.902		Descriptive Statistics
Sub13	104.962	110.799	102.403			Mean	Std. Deviation	N
Sub14	143.755	140.991	153.204		Norm	116.805	28.6094	20
Sub15	104.536	123.303	122.79		Slip	120.743	24.4889	20
Sub16	115.558	132.785	141.124		Slip_VisionBlocked	130.012	25.0489	20
Sub17	88.5329	90.0948	97.4409
Sub18	73.3286	99.5488	126.147
Sub19	141.133	146.616	149.488		Tests of Within-Subjects Effects
Sub20	132.853	142.516	151.958		Measure: MEASURE_1
avg	116.805	120.743	130.012			Source	Type III Sum of Squares	df	Mean Square	F	Sig.	Partial Eta Squared	Noncent. Parameter	Observed Powera
std	28.6094	24.4889	25.0489		conds	Sphericity Assumed	1838.91	2	919.457	18.462	0	0.493	36.925	1
						Greenhouse-Geisser	1838.91	1.65	1114.44	18.462	0	0.493	30.465	0.999
						Huynh-Feldt	1838.91	1.787	1029.14	18.462	0	0.493	32.99	0.999
						Lower-bound	1838.91	1	1838.91	18.462	0	0.493	18.462	0.983
					Error(conds)	Sphericity Assumed	1892.45	38	49.801
						Greenhouse-Geisser	1892.45	31.352	60.362
						Huynh-Feldt	1892.45	33.95	55.742
						Lower-bound	1892.45	19	99.603
					a. Computed using alpha = .05
					Pairwise Comparisons
					Measure: MEASURE_1
					(I) conds	(J) conds	Mean Difference (I-J)	Std. Error	Sig.b	95% Confidence Interval for Differenceb
					Lower Bound	Upper Bound
					1	2	-3.938	2.19	0.264	-9.687	1.811
						3	-13.207*	2.656	0	-20.178	-6.236
					2	1	3.938	2.19	0.264	-1.811	9.687
						3	-9.269*	1.758	0	-13.885	-4.653
					3	1	13.207*	2.656	0	6.236	20.178
						2	9.269*	1.758	0	4.653	13.885
					Based on estimated marginal means
					*. The mean difference is significant at the .05 level.
					b. Adjustment for multiple comparisons: Bonferroni.

## Sheet: StepWidthV
Step Width Variability (%)	Norm	Slip	Slip_VisionBlocked
Sub01	14.2165	12.0117	20.0237		Tests of Normality
Sub02	13.4028	10.7346	15.1063			Shapiro-Wilk
Sub03	12.8832	18.7972	16.1586			Statistic	df	Sig.
Sub04	20.4812	20.0813	21.3511		Norm	0.956	20	0.467
Sub05	11.3965	16.2769	17.66		Slip	0.937	20	0.207
Sub06	15.3297	18.9141	17.7664		Slip_VisionBlocked	0.916	20	0.084
Sub07	17.0903	21.3665	22.5121		*. This is a lower bound of the true significance.
Sub08	14.1436	13.9568	17.7297		a. Lilliefors Significance Correction
Sub09	19.2587	22.6747	23.9939
Sub10	14.7296	14.9235	17.2585
Sub11	17.616	19.4821	24.0243		Descriptive Statistics
Sub12	13.0541	14.7187	16.7791			Mean	Std. Deviation	N
Sub13	14.2038	14.7523	17.8375		Norm	14.3322	2.76664	20
Sub14	10.0862	10.4736	10.9955		Slip	16.0017	3.88303	20
Sub15	12.0424	14.3222	19.4129		Slip_VisionBlocked	19.27	3.62297	20
Sub16	13.4878	13.1948	23.7464
Sub17	16.7011	22.9351	24.1004
Sub18	10.2611	12.024	18.3244		Tests of Within-Subjects Effects
Sub19	12.274	12.7553	16.595		Measure: MEASURE_1
Sub20	13.9855	15.6386	24.025		Source		Type III Sum of Squares	df	Mean Square	F	Sig.	Partial Eta Squared	Noncent. Parameter	Observed Powera
avg	14.3322	16.0017	19.27		conds	Sphericity Assumed	252.344	2	126.172	31.152	0	0.621	62.305	1
std	2.76664	3.88303	3.62297			Greenhouse-Geisser	252.344	1.8	140.168	31.152	0	0.621	56.084	1
						Huynh-Feldt	252.344	1.977	127.632	31.152	0	0.621	61.592	1
						Lower-bound	252.344	1	252.344	31.152	0	0.621	31.152	1
					Error(conds)	Sphericity Assumed	153.906	38	4.05
						Greenhouse-Geisser	153.906	34.206	4.499
						Huynh-Feldt	153.906	37.565	4.097
						Lower-bound	153.906	19	8.1
					a. Computed using alpha = .05
					Pairwise Comparisons
					Measure: MEASURE_1
					(I) conds	(J) conds	Mean Difference (I-J)	Std. Error	Sig.b	95% Confidence Interval for Differenceb
					Lower Bound	Upper Bound
					1	2	-1.669*	0.55	0.02	-3.114	-0.225
						3	-4.938*	0.617	0	-6.556	-3.319
					2	1	1.669*	0.55	0.02	0.225	3.114
						3	-3.268*	0.73	0.001	-5.184	-1.353
					3	1	4.938*	0.617	0	3.319	6.556
						2	3.268*	0.73	0.001	1.353	5.184
					Based on estimated marginal means
					*. The mean difference is significant at the .05 level.
					b. Adjustment for multiple comparisons: Bonferroni.

## Sheet: MOSap
	Norm	Slip	Slip_VisionBlocked
Sub01	-175.926	-179.915	-173.843		Tests of Normality
Sub02	-154.5	-156.044	-135.092			Shapiro-Wilk
Sub03	-170.746	-176.303	-169.66			Statistic	df	Sig.
Sub04	-174.591	-185.742	-170.695		Norm	0.96	20	0.55
Sub05	-133.493	-143.091	-128.243		Slip	0.968	20	0.71
Sub06	-164.519	-171.918	-156.466		Slip_VisionBlocked	0.972	20	0.801
Sub07	-149.494	-156.584	-139.052		*. This is a lower bound of the true significance.
Sub08	-182.182	-190.979	-171.901		a. Lilliefors Significance Correction
Sub09	-160.687	-161.058	-156.34
Sub10	-114.191	-118.888	-112.217
Sub11	-155.689	-157.38	-150.308		Descriptive Statistics
Sub12	-198.906	-208.1	-196.954			Mean	Std. Deviation	N
Sub13	-153.778	-158.24	-134.922		Norm	-154.94	23.9437	20
Sub14	-150.312	-162.565	-135.332		Slip	-161.526	24.1058	20
Sub15	-150.792	-155.05	-138.513		Slip_VisionBlocked	-147.855	26.0511	20
Sub16	-131.906	-138.351	-129.045
Sub17	-191.415	-198.281	-194.219
Sub18	-117.122	-121.925	-102.406		Tests of Within-Subjects Effects
Sub19	-152.714	-160.393	-148.754		Measure: MEASURE_1
Sub20	-115.832	-129.714	-113.146			Source	Type III Sum of Squares	df	Mean Square	F	Sig.	Partial Eta Squared	Noncent. Parameter	Observed Powera
avg	-154.94	-161.526	-147.855		conds	Sphericity Assumed	1869.71	2	934.855	58.646	0	0.755	117.291	1
std	23.9437	24.1058	26.0511			Greenhouse-Geisser	1869.71	1.461	1279.57	58.646	0	0.755	85.693	1
						Huynh-Feldt	1869.71	1.552	1204.54	58.646	0	0.755	91.031	1
						Lower-bound	1869.71	1	1869.71	58.646	0	0.755	58.646	1
					Error(conds)	Sphericity Assumed	605.748	38	15.941
						Greenhouse-Geisser	605.748	27.763	21.819
						Huynh-Feldt	605.748	29.492	20.539
						Lower-bound	605.748	19	31.881
					a. Computed using alpha = .05
					Pairwise Comparisons
					Measure: MEASURE_1
					(I) conds	(J) conds	Mean Difference (I-J)	Std. Error	Sig.b	95% Confidence Interval for Differenceb
					Lower Bound	Upper Bound
					1	2	-7.084*	1.398	0	-10.754	-3.415
						3	6.586*	0.797	0	4.493	8.68
					2	1	7.084*	1.398	0	3.415	10.754
						3	13.671*	1.481	0	9.784	17.558
					3	1	-6.586*	0.797	0	-8.68	-4.493
						2	-13.671*	1.481	0	-17.558	-9.784
					Based on estimated marginal means
					*. The mean difference is significant at the .05 level.
					b. Adjustment for multiple comparisons: Bonferroni.

## Sheet: MOSVap
	Norm	Slip	Slip_VisionBlocked
Sub01	7.65718	7.63448	8.28847
Sub02	9.80839	12.0712	13.7361		Ranks			Tests of Normality
Sub03	7.6646	8.69639	9.64621			Mean Rank			Shapiro-Wilk
Sub04	10.1261	9.51014	11.9117		Norm	1.15			Statistic	df	Sig.
Sub05	13.7315	14.5995	17.4347		Slip	1.9		Norm	0.879	20	0.017
Sub06	9.14283	9.57202	11.7029		Slip_VisionBlocked	2.95		Slip	0.925	20	0.123
Sub07	9.71984	9.99755	11.0401					Slip_VisionBlocked	0.969	20	0.738
Sub08	8.25323	8.92955	13.2736		Test Statisticsa			*. This is a lower bound of the true significance.
Sub09	8.11522	9.50344	9.91082		N	20		a. Lilliefors Significance Correction
Sub10	9.66378	12.2233	15.8608		Chi-Square	32.7
Sub11	16.1013	16.301	17.6885		df	2
Sub12	6.65162	7.21096	7.87303		Asymp. Sig.	0
Sub13	9.93259	11.5116	15.5617		a. Friedman Test
Sub14	9.87866	10.0466	19.8726
Sub15	11.3415	11.7544	18.5148
Sub16	15.8738	16.3954	22.8219		Test Statisticsa
Sub17	8.7712	9.34623	14.3951			Slip - Norm	Slip_VisionBlocked - Norm	Slip_VisionBlocked - Slip
Sub18	12.5832	13.031	19.2172		Z	-2.800b	-3.621b	-3.920b
Sub19	9.74322	10.5823	11.7944		Asymp. Sig. (2-tailed)	0.005	0	0
Sub20	10.3157	10.6577	17.9707		a. Wilcoxon Signed Ranks Test
avg	10.2538	10.9787	14.4258		b. Based on negative ranks.
std	2.55742	2.55954	4.1878

## Sheet: MOSml
MOSml (Margin of Stability in the medial-lateral direction, mm)	Norm	Slip	Slip_VisionBlocked
Sub01	67.1907	77.7106	66.2606		Tests of Normality
Sub02	79.4435	77.2343	75.1078			Shapiro-Wilk
Sub03	58.5803	59.6358	64.6136			Statistic	df	Sig.
Sub04	54.8692	58.1114	61.4661		Norm	0.971	20	0.785
Sub05	76.9911	77.6828	81.3834		Slip	0.945	20	0.303
Sub06	62.1083	69.3642	77.3547		Slip_VisionBlocked	0.938	20	0.223
Sub07	64.8223	67.3214	70.1381		*. This is a lower bound of the true significance.
Sub08	67.956	71.3545	76.1269		a. Lilliefors Significance Correction
Sub09	68.3872	68.7121	73.3526
Sub10	57.2581	58.4704	58.9819
Sub11	67.5441	70.024	70.2888
Sub12	66.4266	60.0287	75.4157		Descriptive Statistics
Sub13	45.4606	54.3619	50.1473			Mean	Std. Deviation	N
Sub14	64.6491	65.441	76.1049		Norm	62.6174	9.46137	20
Sub15	74.137	77.599	77.4815		Slip	65.456	8.42194	20
Sub16	51.7786	58.7811	61.6408		Slip_VisionBlocked	67.992	8.91675	20
Sub17	61.507	65.0276	63.5763
Sub18	63.369	65.5693	67.3881
Sub19	42.6109	48.3679	49.5567		Tests of Within-Subjects Effects
Sub20	57.2576	58.323	63.455		Measure: MEASURE_1
avg	62.6174	65.456	67.992			Source	Type III Sum of Squares	df	Mean Square	F	Sig.	Partial Eta Squared	Noncent. Parameter	Observed Powera
std	9.46137	8.42194	8.91675		conds	Sphericity Assumed	289.176	2	144.588	13.577	0	0.417	27.154	0.997
						Greenhouse-Geisser	289.176	1.66	174.253	13.577	0	0.417	22.531	0.99
						Huynh-Feldt	289.176	1.799	160.769	13.577	0	0.417	24.421	0.994
						Lower-bound	289.176	1	289.176	13.577	0.002	0.417	13.577	0.937
					Error(conds)	Sphericity Assumed	404.681	38	10.65
						Greenhouse-Geisser	404.681	31.531	12.834
						Huynh-Feldt	404.681	34.175	11.841
						Lower-bound	404.681	19	21.299
					a. Computed using alpha = .05
					Pairwise Comparisons
					Measure: MEASURE_1
					(I) conds	(J) conds	Mean Difference (I-J)	Std. Error	Sig.b	95% Confidence Interval for Differenceb
					Lower Bound	Upper Bound
					1	2	-2.839*	0.855	0.011	-5.084	-0.593
						3	-5.375*	0.964	0	-7.906	-2.843
					2	1	2.839*	0.855	0.011	0.593	5.084
						3	-2.536	1.238	0.164	-5.787	0.715
					3	1	5.375*	0.964	0	2.843	7.906
						2	2.536	1.238	0.164	-0.715	5.787
					Based on estimated marginal means
					*. The mean difference is significant at the .05 level.
					b. Adjustment for multiple comparisons: Bonferroni.

## Sheet: MOSVml
MOSVml (Margin of Stability Variability in the medial-lateral direction, mm)	Norm	Slip	Slip_VisionBlocked
Sub01	12.788	16.1875	17.5466		Tests of Normality
Sub02	10.7062	12.1543	13.3868			Shapiro-Wilk
Sub03	15.562	17.3519	16.7565			Statistic	df	Sig.
Sub04	10.7391	15.0999	17.2335		Norm	0.983	20	0.966
Sub05	10.9417	10.9124	13.6833		Slip	0.953	20	0.412
Sub06	11.1349	15.6755	16.655		Slip_VisionBlocked	0.945	20	0.292
Sub07	9.19654	13.3074	15.8418		*. This is a lower bound of the true significance.
Sub08	15.2148	17.7619	17.138		a. Lilliefors Significance Correction
Sub09	11.8217	14.6001	15.7378
Sub10	11.4472	15.2271	15.5373
Sub11	13.3151	14.5202	15.2866		Descriptive Statistics
Sub12	11.9376	14.6036	14.2134			Mean	Std. Deviation	N
Sub13	14.6483	18.4645	21.0281		Norm	12.5652	1.66641	20
Sub14	14.2473	18.343	19.3095		Slip	15.4284	2.15155	20
Sub15	13.8914	16.4438	22.9948		Slip_VisionBlocked	16.8542	2.462	20
Sub16	12.2896	14.396	17.0241
Sub17	13.225	18.0115	18.76
Sub18	12.4831	14.2709	15.2715		Tests of Within-Subjects Effects
Sub19	13.7278	18.1004	19.2456		Measure: MEASURE_1
Sub20	11.9869	13.1353	14.4338			Source	Type III Sum of Squares	df	Mean Square	F	Sig.	Partial Eta Squared	Noncent. Parameter	Observed Powera
avg	12.5652	15.4284	16.8542		conds	Sphericity Assumed	190.84	2	95.42	67.409	0	0.78	134.818	1
std	1.66641	2.15155	2.462			Greenhouse-Geisser	190.84	1.62	117.834	67.409	0	0.78	109.173	1
						Huynh-Feldt	190.84	1.749	109.139	67.409	0	0.78	117.871	1
						Lower-bound	190.84	1	190.84	67.409	0	0.78	67.409	1
					Error(conds)	Sphericity Assumed	53.79	38	1.416
						Greenhouse-Geisser	53.79	30.772	1.748
						Huynh-Feldt	53.79	33.223	1.619
						Lower-bound	53.79	19	2.831
					a. Computed using alpha = .05
					Pairwise Comparisons
					Measure: MEASURE_1
					(I) conds	(J) conds	Mean Difference (I-J)	Std. Error	Sig.b	95% Confidence Interval for Differenceb
					Lower Bound	Upper Bound
					1	2	-2.863*	0.305	0	-3.664	-2.063
						3	-4.289*	0.456	0	-5.486	-3.092
					2	1	2.863*	0.305	0	2.063	3.664
						3	-1.426*	0.352	0.002	-2.35	-0.502
					3	1	4.289*	0.456	0	3.092	5.486
						2	1.426*	0.352	0.002	0.502	2.35
					Based on estimated marginal means
					*. The mean difference is significant at the .05 level.
					b. Adjustment for multiple comparisons: Bonferroni.

## Sheet: MOSSIap
	SIMOSap (Symmetric Index MOS ap)	Norm	Slip	Slip_VisionBlocked
	-0.0168	0.0041	0.0038			Tests of Normality
	-0.0136	0.0283	-0.026			Shapiro-Wilk
	0.0148	0.0018	0.0314			Statistic	df	Sig.
	0.0373	-0.0322	-0.0474		Norm	0.972	20	0.796
	0.1031	0.1119	0.0776		Slip	0.976	20	0.868
	-0.0406	-0.0907	-0.0587		Slip_VisionBlocked	0.973	20	0.825
	0.0406	0.0075	-0.0353			* This is a lower bound of the true significance.
	0.0187	0.0638	0.0937			a Lilliefors Significance Correction
	0.1091	0.1416	0.0681
	0.0897	0.0906	0.1621
	0.0421	-0.0344	-0.0537
	0.1161	0.0773	0.0796		Descriptive Statistics
	0.0587	0.0954	0.0675			Mean	Std. Deviation	N
	-0.0235	0.0231	0.05		Norm	0.031655	0.0659997	20
	-0.0911	-0.0501	-0.017		Slip	0.028545	0.0703193	20
	-0.08	-0.1025	-0.1089		SlipVisionBlocked	0.033075	0.0756729	20
	-0.0249	0.003	0.0208
	0.065	0.0539	0.0698
	0.0857	0.0318	0.1084
	0.1427	0.1467	0.1757		Tests of Within-Subjects Effects
avg	0.031655	0.028545	0.033075		Measure: MEASURE_1
std	0.0659997	0.0703193	0.0756729		Source		Type III Sum of Squares	df	Mean Square	F	Sig.	Partial Eta Squared	Noncent. Parameter	Observed Powera
					conds	Sphericity Assumed	0	2	0	0.108	0.898	0.006	0.216	0.065
						Greenhouse-Geisser	0	1.711	0	0.108	0.869	0.006	0.185	0.064
						Huynh-Feldt	0	1.863	0	0.108	0.885	0.006	0.201	0.065
						Lower-bound	0	1	0	0.108	0.746	0.006	0.108	0.061
					Error(conds)	Sphericity Assumed	0.038	38	0.001
						Greenhouse-Geisser	0.038	32.501	0.001
						Huynh-Feldt	0.038	35.398	0.001
						Lower-bound	0.038	19	0.002
					a Computed using alpha = .05

[truncated: 1 more sheets: MOSSIml]
